# Supplementary material for: Reliable high work-function molybdenum dioxide synthesis via template-effect-utilizing atomic layer deposition for next-generation electrode applications
Source: Royal Society of Chemistry journal article supplement (doi:10.1039/d2tc02104h), 2022-01-01
Supplement: d2tc02104h1.pdf [file d2tc02104h1.pdf]

Electronic Supplementary Information

# Reliable high work-function molybdenum dioxide synthesis via template-effect-utilizing atomic layer deposition for next-generation electrode application

*Ye Won Kim,<sup>1</sup> Ae Jin Lee,<sup>1</sup> Dong Hee Han,<sup>1</sup> Dae Cheol Lee,<sup>1</sup> Ji Hyeon Hwang,<sup>1</sup> Youngjin Kim,<sup>1</sup> Songyi Moon,<sup>2</sup> Taewon Youn,<sup>2</sup> Minyung Lee,<sup>2</sup> and Woojin Jeon<sup>1\*</sup>*

<sup>1</sup>Department of Advanced Materials Engineering for Information and Electronics, and Integrated Education Program for Frontier Science & Technology (BK21 Four), Kyung Hee University, Yongin, Gyeonggi 17104, Korea

<sup>2</sup>SK Hynix, Inc., Icheon, Gyeonggi 17336, Korea

**KEYWORDS.** Molybdenum dioxide, atomic layer deposition, dynamic random-access memory, metal–insulator–metal capacitor, electrode

### *Electrical characteristics of deposited MoO<sub>2</sub> thin-film electrodes*

The electrical characteristics of the deposited MoO<sub>x</sub> thin films were evaluated to apply MoO<sub>x</sub> as an electrode material. The resistivities of the MoO<sub>x</sub> films deposited using O<sub>3</sub> on the TiN substrate were investigated for various film thicknesses (**Figure S7a**). In the MoO<sub>x</sub> films up to 7.5 nm thick, wherein the crystal structure consisted of only the original MoO<sub>2</sub> phase, the resistivity was  $1.3 \times 10^{-3} \Omega \cdot \text{cm}$ . The increased resistivity of the 10-nm-thick MoO<sub>x</sub> thin film was attributed to crystallized-MoO<sub>3</sub>-induced film degradation because crystallized MoO<sub>3</sub> is an electrical insulator. The surface morphology was examined using atomic force microscopy (AFM) (Figure S7b). The root-mean-square roughness ( $R_{\text{rms}}$ ) of all the samples was less than 1.98 nm without any extrusion, which can induce severe leakage current degradation in MIM capacitors. These results show that MoO<sub>x</sub> deposited using O<sub>3</sub> on the TiN substrate exhibited electrical properties comparable to those of pure TiN as an alternative electrode material for application to MIM capacitors. However, MoO<sub>x</sub> thin films are not just electrically comparable to TiN. As an MIM capacitor electrode, a higher-work-function conductor must also be favorable to suppress leakage current conduction. The MIM capacitor fabricated using the ALD TiN electrode exhibited a work function of 4.2 eV. However, the MoO<sub>x</sub>/TiN work function was considerably higher (5.5 eV, Figure 5c), which is the highest work function among all the ALD electrode materials (Table I). Moreover, even the 3.5-nm-thick ALD MoO<sub>2</sub> film exhibited a work function as high as 5.4 eV.

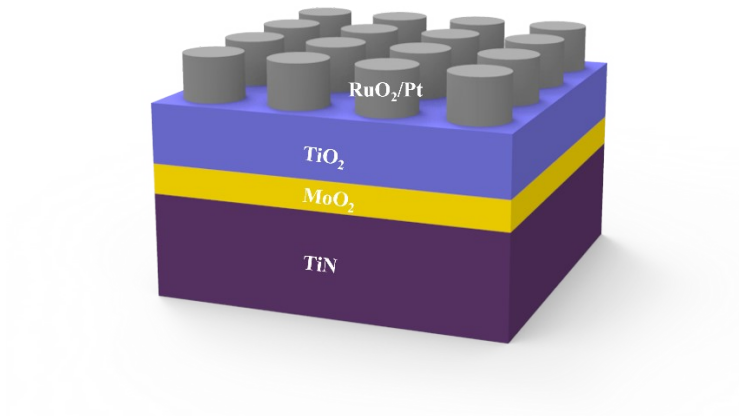

**Figure S1.** Schematic of the fabricated metal-insulator-metal structure.

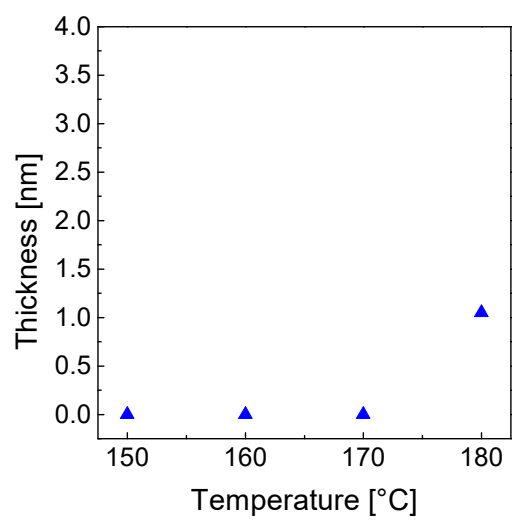

**Figure S2.** Thicknesses of MoO<sub>x</sub> films deposited at different substrate temperatures.

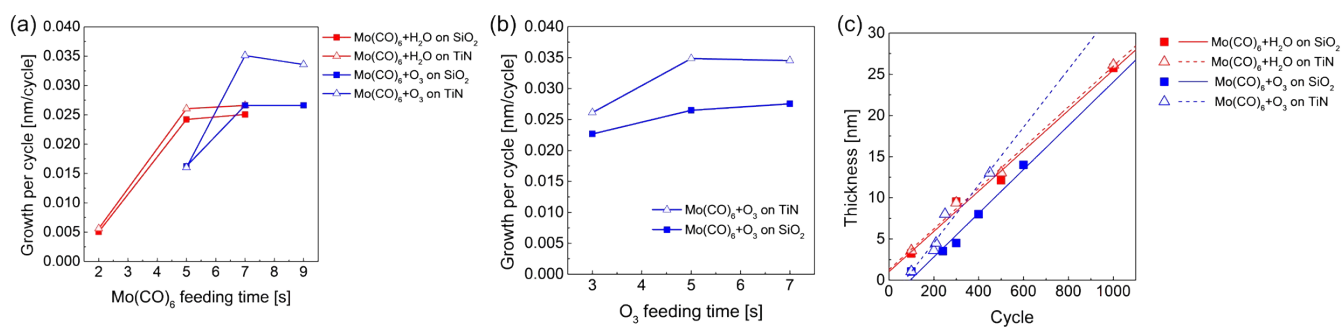

**Figure S3.** Growth per cycle plotted as functions of (a) Mo(CO)<sub>6</sub> feeding time and (b) O<sub>3</sub> feeding time. (c) Thickness of deposited MoO<sub>x</sub> thin films plotted as functions of number of cycles for various process conditions and substrates.

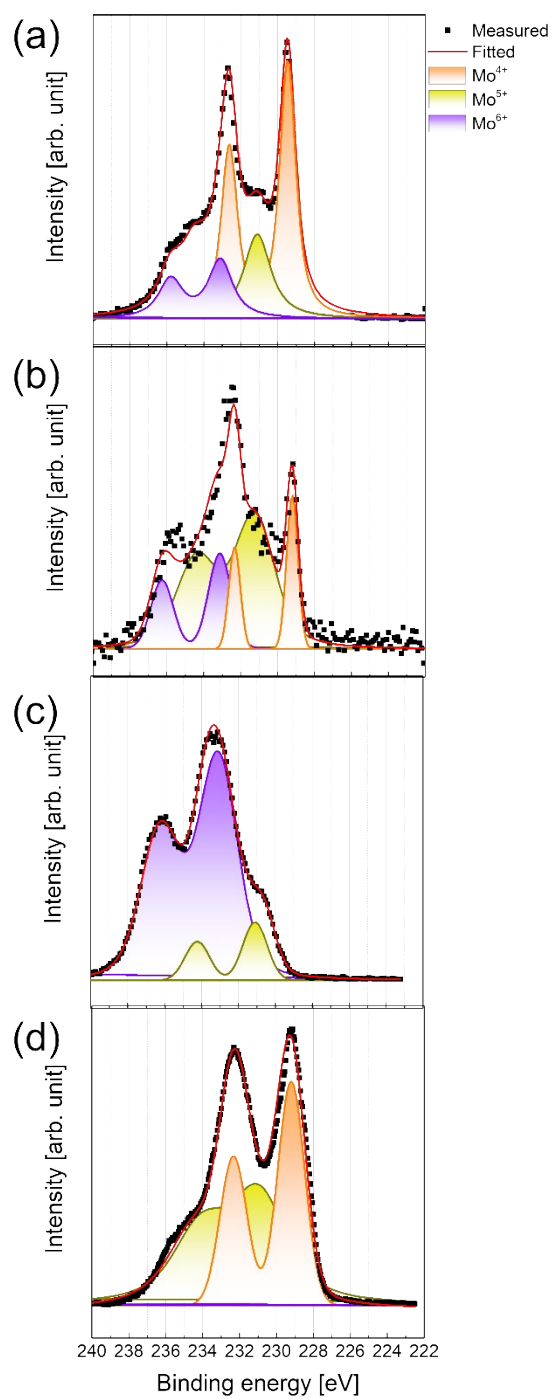

**Figure S4.** XPS Mo 3d spectra of (a) Mo(CO)<sub>6</sub>+O<sub>3</sub> and (b) Mo(CO)<sub>6</sub>+H<sub>2</sub>O thin films deposited on TiN and (c) Mo(CO)<sub>6</sub>+O<sub>3</sub> and (d) Mo(CO)<sub>6</sub>+H<sub>2</sub>O thin films deposited on SiO<sub>2</sub>.

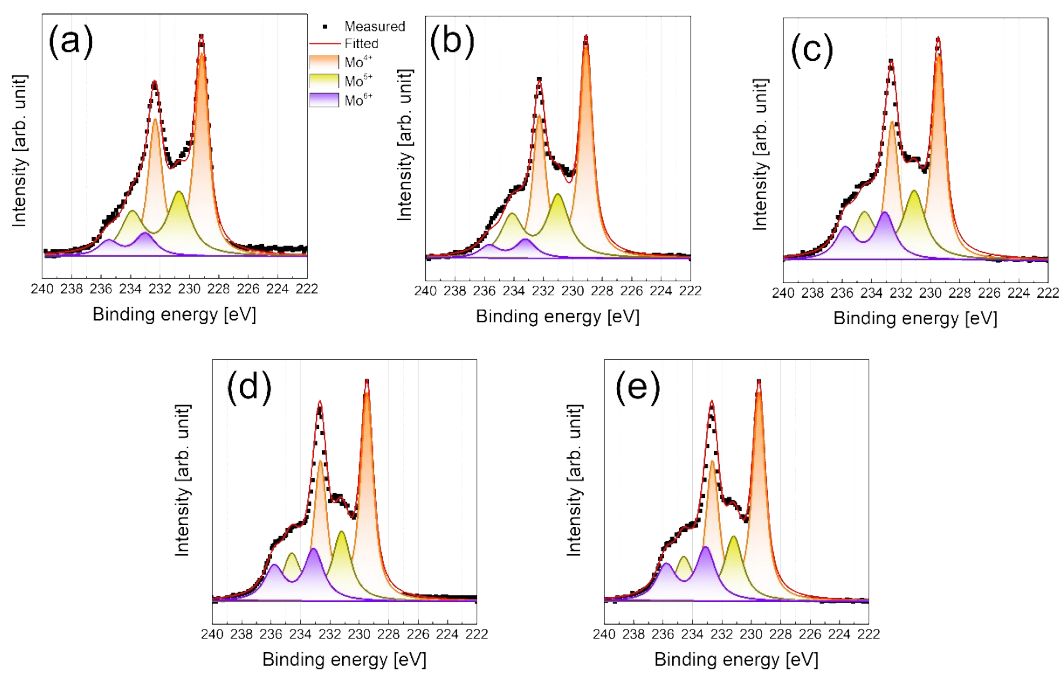

**Figure S5.** Mo  $3d$  XPS spectra of (a) 1.2-, (b) 3.6-, (c) 4.1-, (d) 8.0-, and (e) 12.4-nm-thick  $\text{MoO}_2$  thin films.

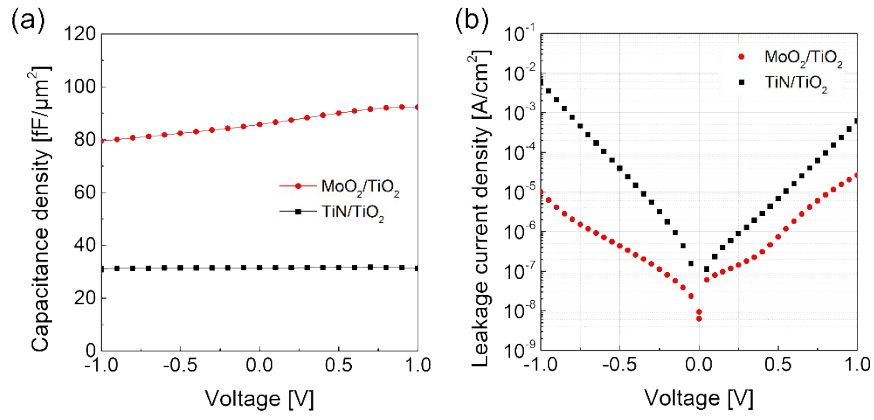

**Figure S6.** (a) C–V and corresponding (b) J–V curves for 16-nm-thick TiO<sub>2</sub> thin films deposited on MoO<sub>2</sub> and TiN substrates.



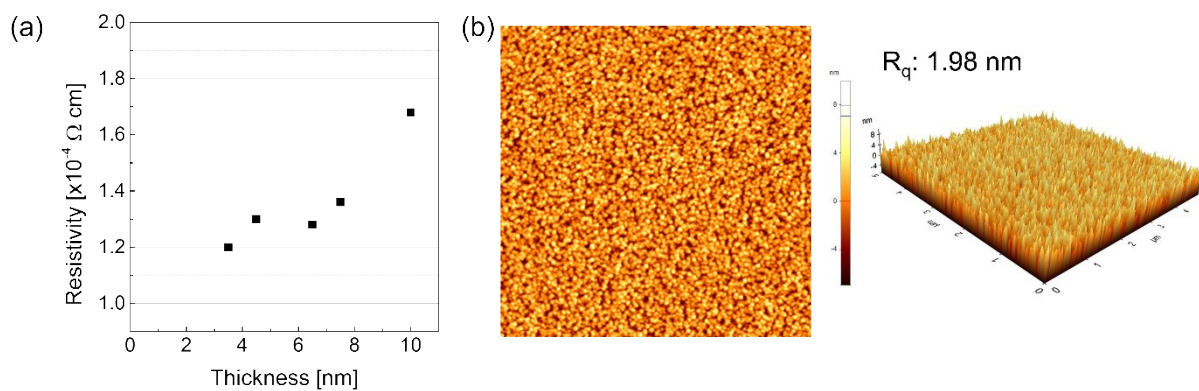

**Figure S7.** (a) Resistivity of MoO<sub>2</sub> thin films deposited at various thicknesses. (b) AFM image and  $R_{\text{rms}}$  of 4.5-nm-thick MoO<sub>2</sub> thin film.
